# Supplementary material for: Expression Profiling Reveals Novel Hypoxic Biomarkers in Peripheral Blood of Adult Mice Exposed to Chronic Hypoxia
Source: PLoS One. 2012 May 22;7(5):e37497. doi: 10.1371/journal.pone.0037497 (PMC3358260; doi:10.1371/journal.pone.0037497)
Supplement: Table S3 — Differentially expressed genes in common with Gharib SA et al., Sleep. 2010 Nov;33(11):1439–46. Common genes expressed in our study after chronic hypoxia exposure and Gharib et al. studying bone marrow of mice exposed to intermittent hypoxia. (XLS) [file pone.0037497.s003.xls]

## Sheet: Sheet1
Table S3. Differentially expressed genes in common with Gharib SA et al., Sleep. 2010 Nov;33(11):1439-46.
Probeset ID	Gene Title	Gene Symbol
1428108_x_at	transmembrane and coiled-coil domains 2	Tmcc2
1418011_a_at	SH3-domain GRB2-like B1 (endophilin)	Sh3glb1
1427084_a_at	mitogen-activated protein kinase kinase kinase kinase 5	Map4k5
1424585_at	RAN binding protein 10	Ranbp10
1431068_at	similar to required for meiotic nuclear division 5 homolog A	Rmnd5a
1425986_a_at	DCN1, defective in cullin neddylation 1, domain containing 1	Dcun1d1
1417636_at	solute carrier family 6 (neurotransmitter transporter, glycine), member 9	Slc6a9
1454930_at	tubulin folding cofactor E-like	Tbcel
1438242_at	ubiquitin specific peptidase 40	Usp40
1425814_a_at	calcitonin receptor-like	Calcrl
1423166_at	CD36 antigen	Cd36
1429144_at	preimplantation protein 4	Prei4
1432273_a_at	Duffy blood group, chemokine receptor	Darc
1447919_x_at	NADH dehydrogenase (ubiquinone) 1, alpha/beta subcomplex, 1	Ndufab1
1434078_at	ubiquitin family domain containing 1	Ubfd1
Common genes expressed in our study after chronic hypoxia exposure and Gharib SA et al. studying bone marrow of mice exposed to intermittent hypoxia.
